# Supplementary material for: Lysine acetyltransferase 8 is involved in cerebral development and syndromic intellectual disability
Source: JCI journal article supplement (doi:10.1172/jci131145), 2019-12-03
Supplement: sd1 [file 1]

**This supplemental section contains:**

Supplemental Figures S1-S10

Supplemental Table S1

**SUPPLEMENTARY FIGURE LEGENDS**

**Figure S1. *Kat8* expression in the developing cerebrum and its loss in cerebrum-specific**

**knockouts. (A)** Immunostaining with the anti-H4K16ac antibody in E12.5 embryonic sections and postnatal brain sections (P5 and adult). Only a portion of a representative para-sagittal section is shown here. DAPI staining showed that H4K16ac fluorescence signals were localized to the nuclei. Scale bars, 200  $\mu$ m. **(B-C)** FPKM (fragments per kilobase of transcript per million mapped reads) values of transcripts for *Kat8* and genes encoding its associated subunits at the wild-type neonatal cerebrum (B) and E18.5 neurospheres (C). Duplicates of RNA-Seq datasets (GEO, GSE133195) were used for generation of the panels by Tophat. Note that the datasets were from bulk RNA-Seq, which does not reveal expression in individual cell types or at the early or later timepoints than the analyzed days (i.e. E16.5 and P0). **(D)** Immunostaining with the anti-H4K16ac antibody in the E12.5 wild-type and mutant embryonic sections. Merged panels represent co-localization of anti-H4K16ac fluorescence and counterstained DAPI signals. The boxed areas of wild-type and mutant cerebrocortical neuroepithelia are enlarged at the right. Three red arrowheads demarcate the boundary of the deleted and non-deleted areas. Residual positive cells in the mutant cerebrocortical neuroepithelium are perhaps related to or derived from interneuron (or microglial) precursors. Results are representative of two independent experiments. Scale bars, 500  $\mu$ m. Abbreviations: CA1, Cornu Ammonis area 1 of the hippocampus; Ch, choroid plexus; DG, dentate gyrus; GE, ganglionic eminence; Hp-Pri,

hippocampus primordium; LV, lateral ventricle; PP, pre-cortical plate; SVZ, subventricular zone; VZ, ventricular zone.

**Figure S2. Photos of the control and mutant mice or brains.** (A) Photos of wild-type and cKO mouse at P6. (B) Photos of wild-type and cKO mouse at P14. (C) Representative brain images for the wild-type and cKO mice at P5. This is a different pair from that shown in Figure 1F. (D-F) Brain images of another pair at P1, E18.5 and E16.5. Each image is representative of at least five different experiment. Scale bars, 1 mm. Abbreviations: Cb, cerebellum; CP, cortical plate; Cx, cerebral cortex; Hp, hippocampus; Ob, olfactory bulb; Th, thalamus.

**Figure S3. *Kat8* deletion causes defective cerebral lamination.** (A) Immunostaining analysis of wild E16.5 brain sections with anti-CTIP2 and -CUX1 antibodies. Enlarged images of the boxed areas are shown at the right. (B) Same as (A) but mutant brain sections were analyzed. The results revealed cerebral lamination defects in the mutant brain. The images are representative from four different experiments. Scale bars: left panels, 500  $\mu\text{m}$ ; middle and right panels, 100  $\mu\text{m}$ . See the Figure 1 legend for abbreviations.

**Figure S4. Immunostaining analysis of control and mutant embryonic sections with an anti-TBR2 antibody.** (A) Immunostaining analysis of E13.5 control and mutant embryonic sections with an anti-TBR2 antibody. Enlarged images of the squared areas are shown at the middle and right. (B) Same as (A) except that E12.5 embryonic sections were analyzed. Shown images are representatives of three (A) or four (B) experiments. Scale bars, 500  $\mu\text{m}$  (left panels) and 100  $\mu\text{m}$  (middle and right panels).

**Figure S5. Effect of *Kat8* deletion on cell proliferation and DNA damage response at E12.5.**

(A) Immunostaining analysis of E12.5 control and mutant embryonic sections with anti-BrdU and Ki67 antibodies. Enlarged images of the squared areas are shown at the middle and right. For BrdU labeling, mating was timed and BrdU was injected intraperitoneally into E12.5 pregnant mice. After 1 h, mice were euthanized for embryo retrieval, genotyping, section preparation and subsequent immunostaining with the indicated antibodies. (B) Immunostaining analysis of E12.5 control and mutant embryonic sections with an anti-phospho-Ser139 H2A.X ( $\gamma$ H2A.X) antibody. Images are representative of 4 (A) or 3 (B) independent experiments.

**Figure S6. Impact of *Kat8* deletion on apoptosis at E12.5.** (A) TUNEL staining of E12.5 embryonic sections uncovered massive apoptosis at the mutant cerebrocortical neuroepithelium. Each image is representative of three different experiment. (B) Immunostaining analysis of E12.5 embryonic sections with the anti-cleaved caspase 3 antibody confirmed massive apoptosis at the mutant neuroepithelium. Images are representative of 3 independent experiments. Scale bars, 500  $\mu$ m (left panels) and 100  $\mu$ m (middle and right panels).

**Figure S7. Histone H4K16 acetylation and propionylation in wild-type and mutant embryos.** (A-B) High-magnification images of representative cells from E13.5 wild-type cerebrocortical neuroepithelia immunostained with anti-H4K16ac (A) and -H4K16pr (B) antibodies. Scale bar, 10  $\mu$ m. (C-D) Immunostaining of E12.5 wild-type (C) and mutant (D) embryonic sections with the anti-H4K16pr antibody. Two green arrowheads demarcate the boundary of the deleted and non-deleted areas. Residual positive cells in the mutant

cerebrocortical neuroepithelium are perhaps related to or derived from interneuron (or microglial) precursors. Images in (A-D) are representative of at least two different experiments. GE, ganglionic eminence; pr, propionylation. Scale bars, 500  $\mu\text{m}$  (left panels) and 100  $\mu\text{m}$  (middle and right panels). (E) Model on how various metabolites may differentially regulate H4K16 acetylation and propionylation by KAT8. Only pyruvate and acetate are illustrated for events upstream from acetyl-CoA, a central player downstream from diverse metabolic pathways. Based on relative concentrations of acetyl-CoA and propionyl-CoA *in vivo*, H4K16 acetylation may thus play a major role whereas H4K16 propionylation complements acetylation. As for functional impact, the two modifications may bind to protein readers differently.

**Figure S8. Photographs and brain MRI images of individual T3.** (A-B) Facial and hand photos taken at the age of 12 years and 3 months. (C) Brain MRI scans were performed at the age of 11 years and 7 months. See Table S1 for MRI image assessment.

**Figure S9. MRI images from three individuals.** (A) Brain images of individuals T6, T7 and T9. (B) Head and additional brain images of individual T7. (C) Skeletal images of individual T7. See Table S1 for MRI image assessment.

**Figure S10. Sequence, domain organization and function of KAT8.** (A) Sequence comparison of human KAT8 with fly Mof. Residues altered in the variants from the nine individuals (Figure 7A) are marked, along with an autoacetylation site (Lys-274) and a key catalytic residue (Glu-338). Five acetylated lysine residues in the KAT8/of-specific domain are shown in light green. (B) Schematic illustration of KAT8 domains and its two stoichiometric multisubunit complexes.

See Figure S1B-C for expression of mouse genes encoding KAT8 and its associated subunits. KAT8 possesses a chromobarrel domain and an acetyltransferase domain. The acetyltransferase domain is sufficient for formation of both complexes and contains a small KAT8/Mof-specific region adjacent to the MYST domain (A). The position of an acetyl-CoA binding motif is marked with a short bar. The domain organization is also illustrated for the p.Lys175\* truncation variant from individual T9 (Figure 7A) and the artificial N-terminal truncation mutant 88-458. (C) Nucleosomal histone H4 acetylation assays showing truncation mutant 88-458 (B) is inactive in acetylation of nucleosomal histone H4K16. KAT8 and the truncation mutant were expressed as FLAG-tagged fusion proteins in HEK293 cells along with HA-tagged MSL1/2/3 subunits for immunoprecipitation (IP) on the anti-FLAG M2 agarose and elution with the FLAG peptide. Eluted proteins were detected by immunoblotting (IB) with anti-FLAG and -HA antibodies (top two panels). Acetylation of H4K5 and H4K16 was detected by immunoblotting with antibodies recognizing histone H4 or its acetylated forms (bottom three panels). Impact on H4K5ac was less dramatic than that on H4K16ac. Results are representative of two different experiments.

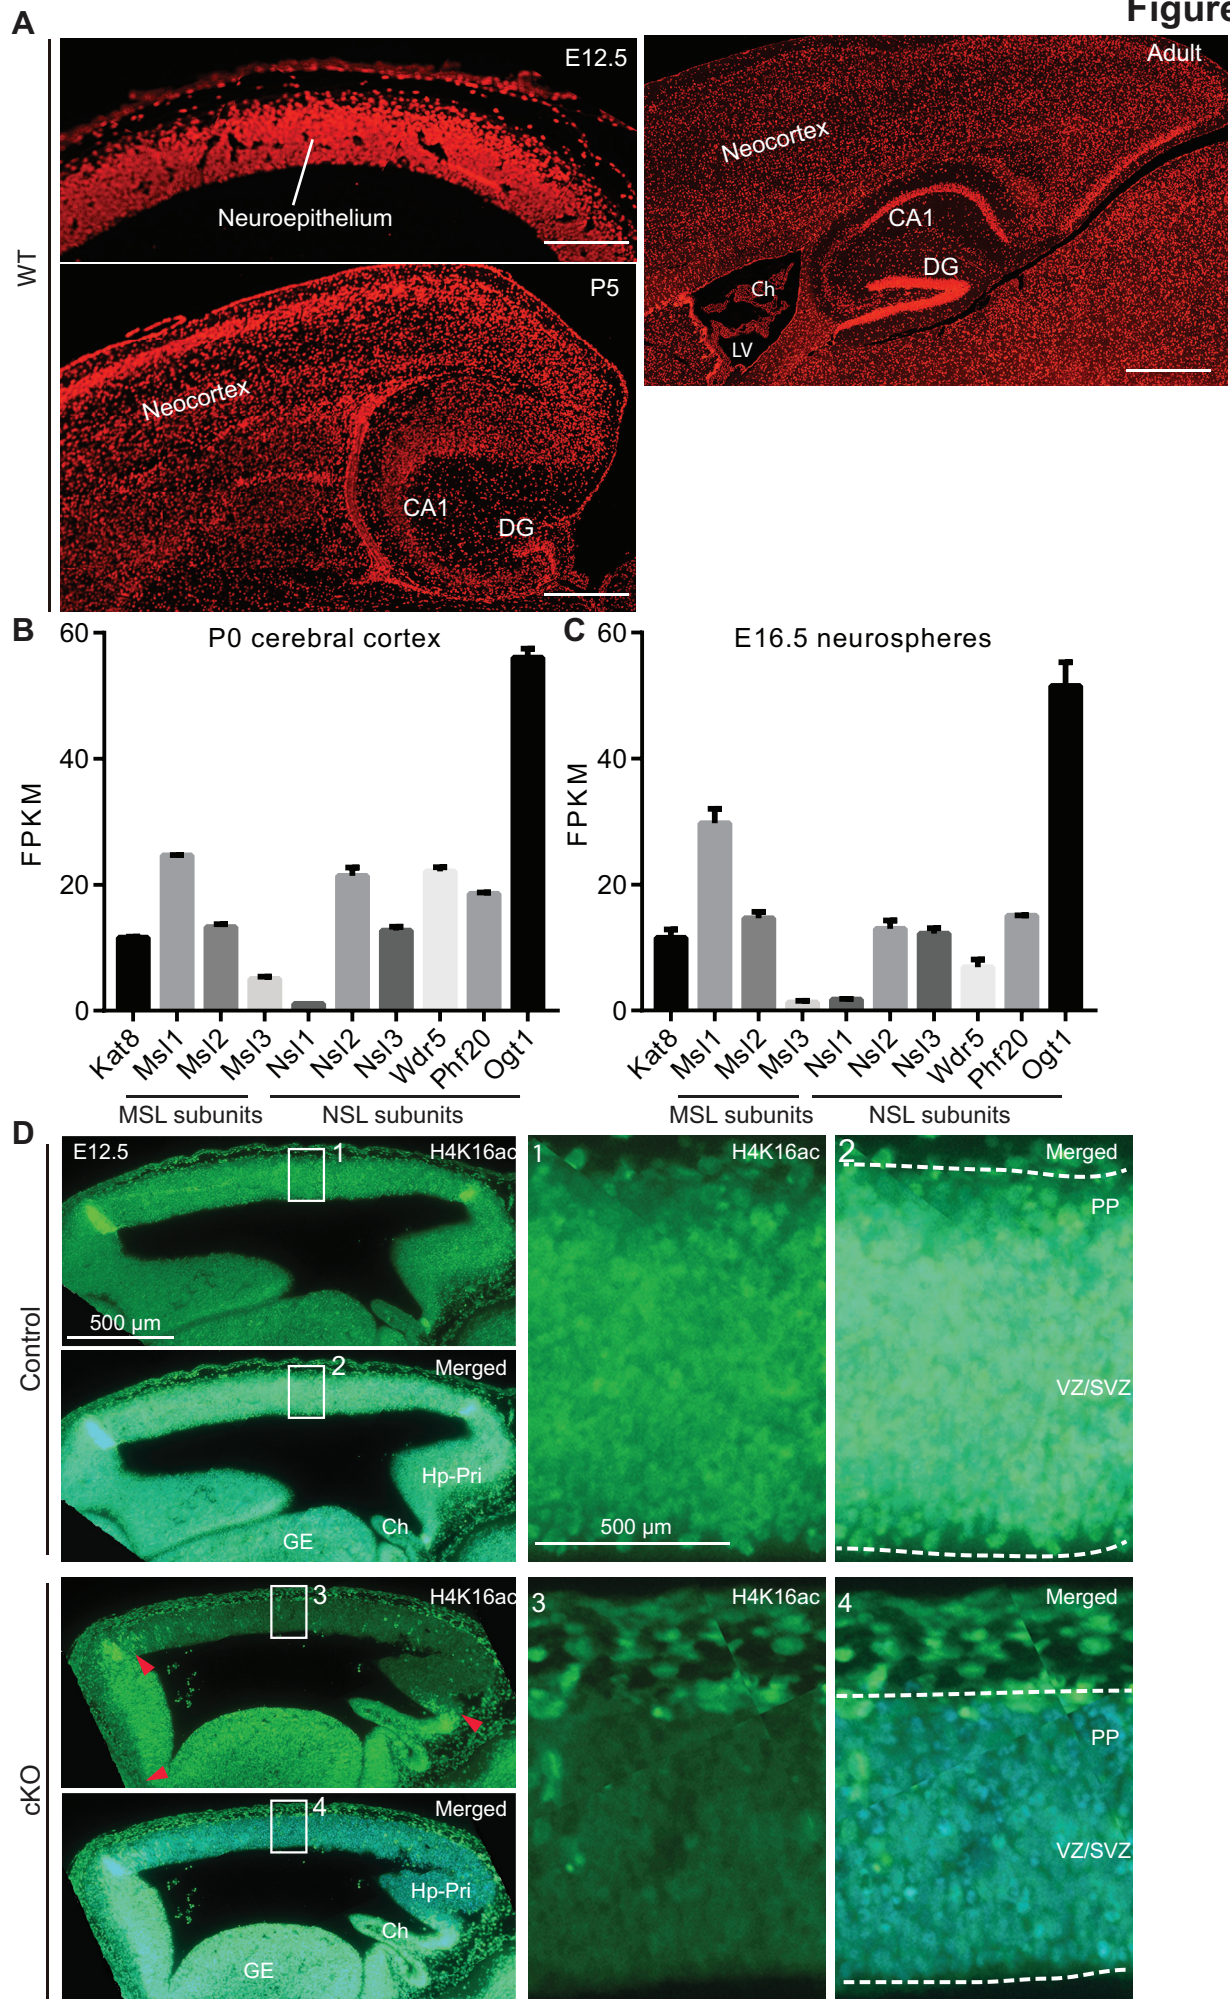

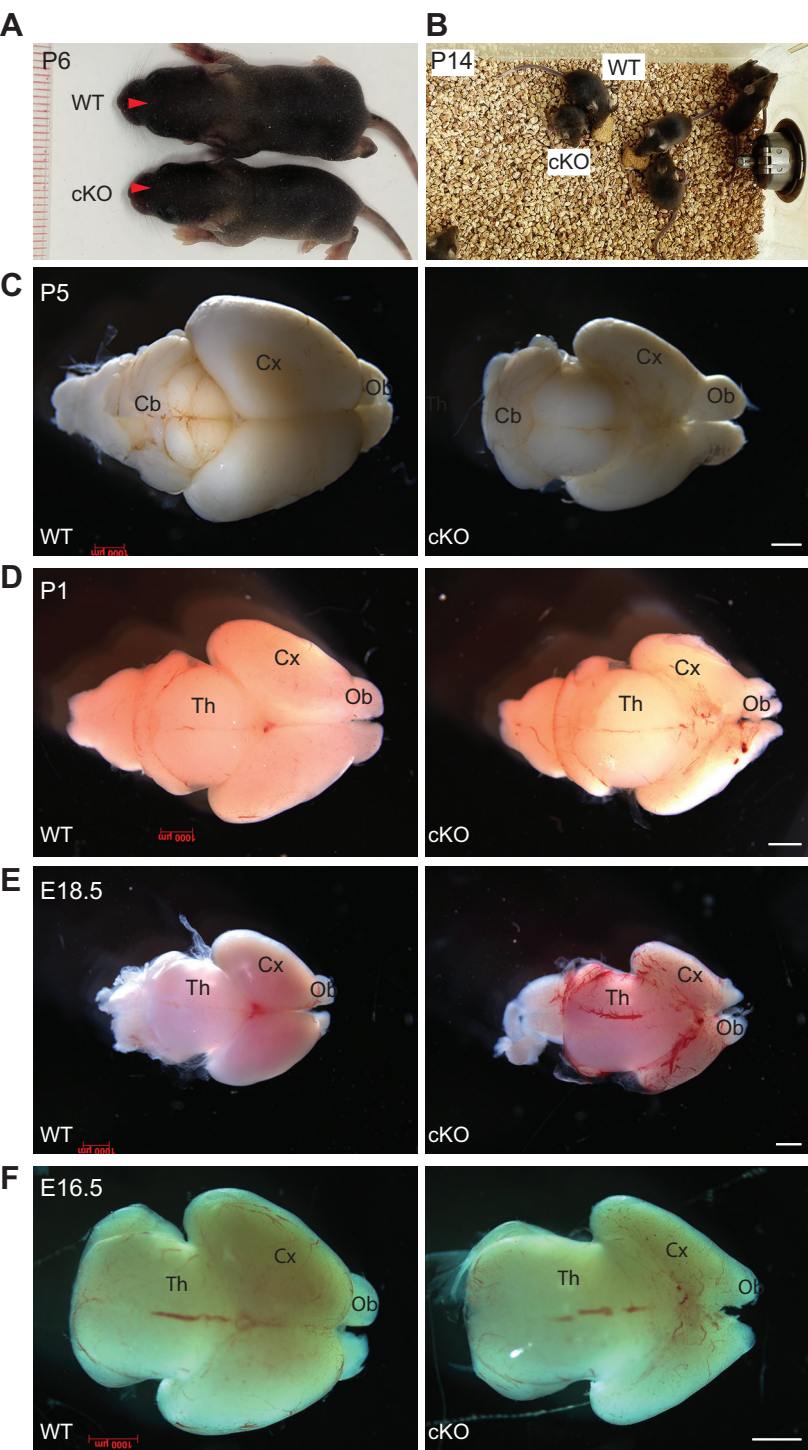

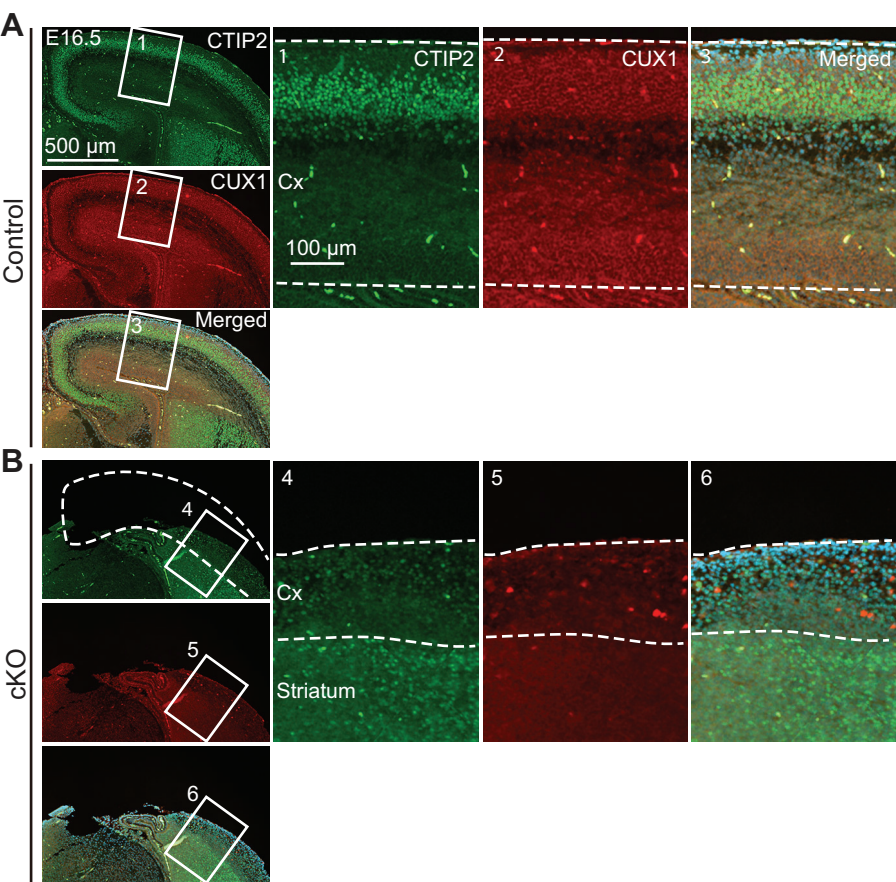



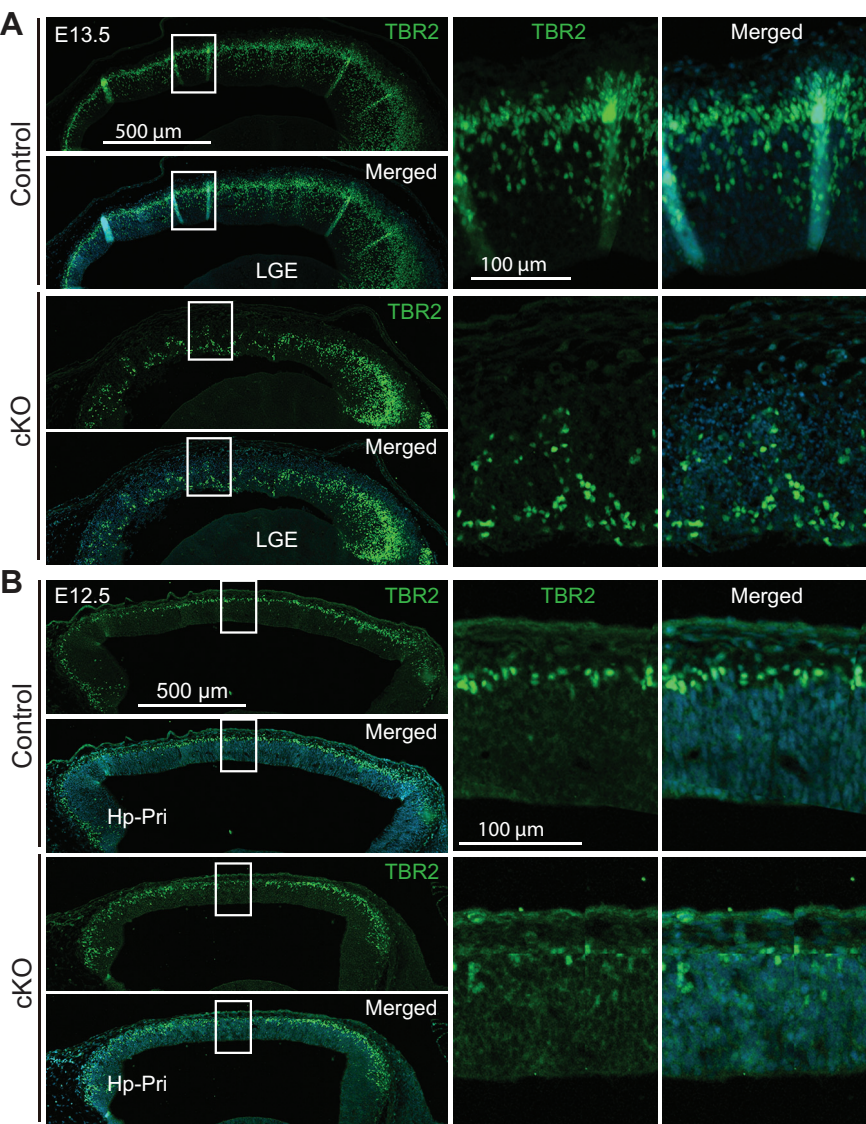

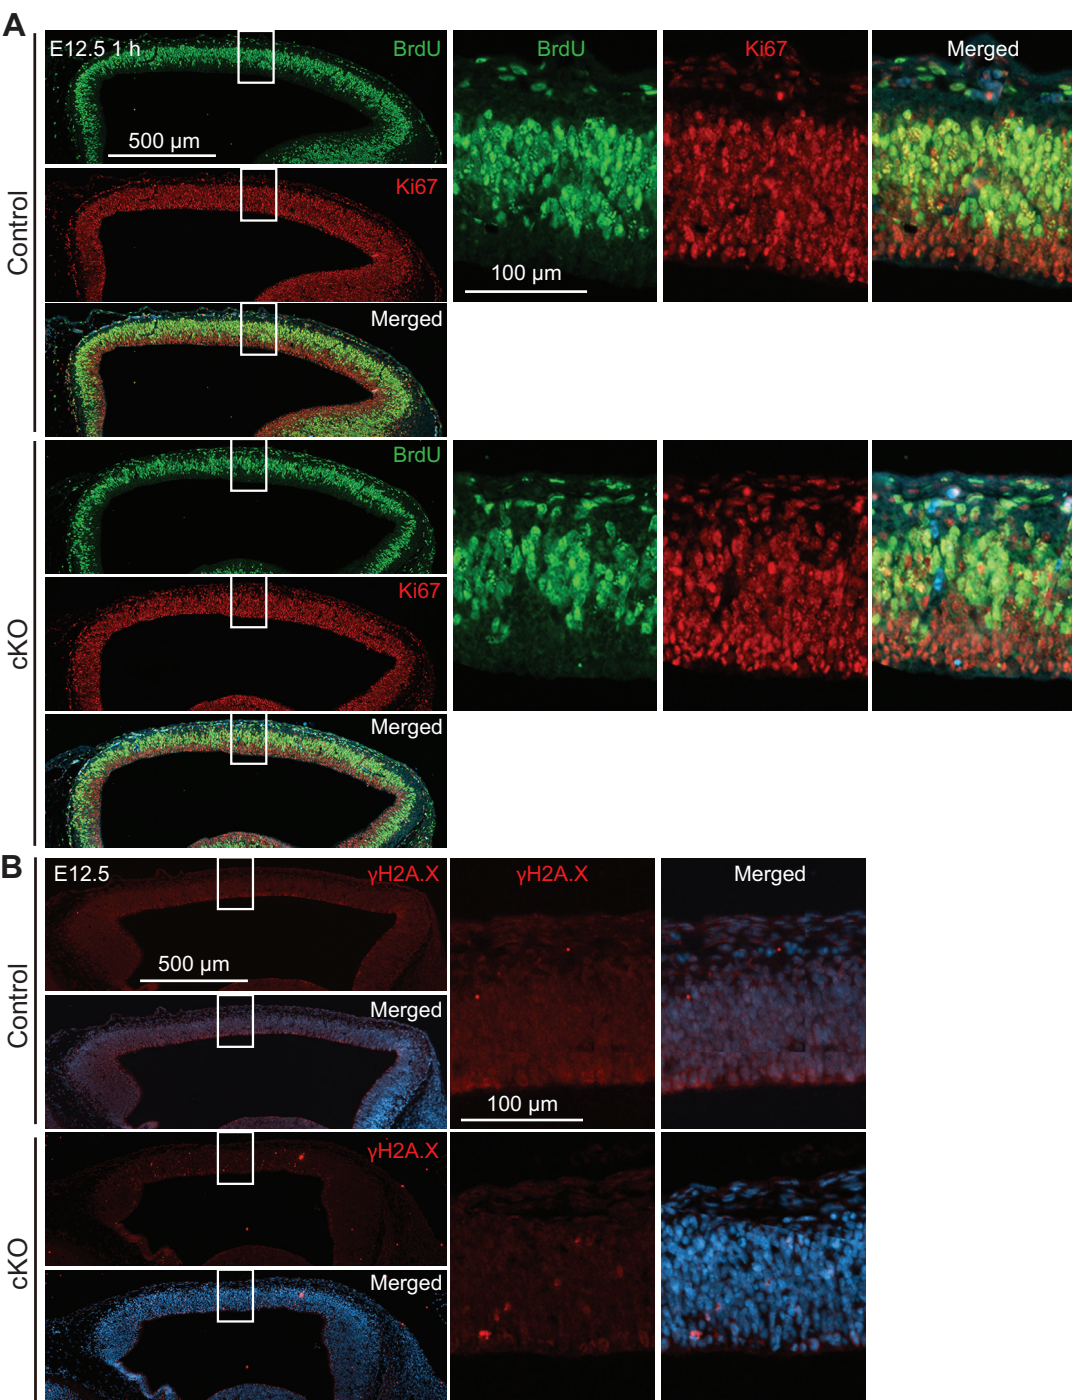

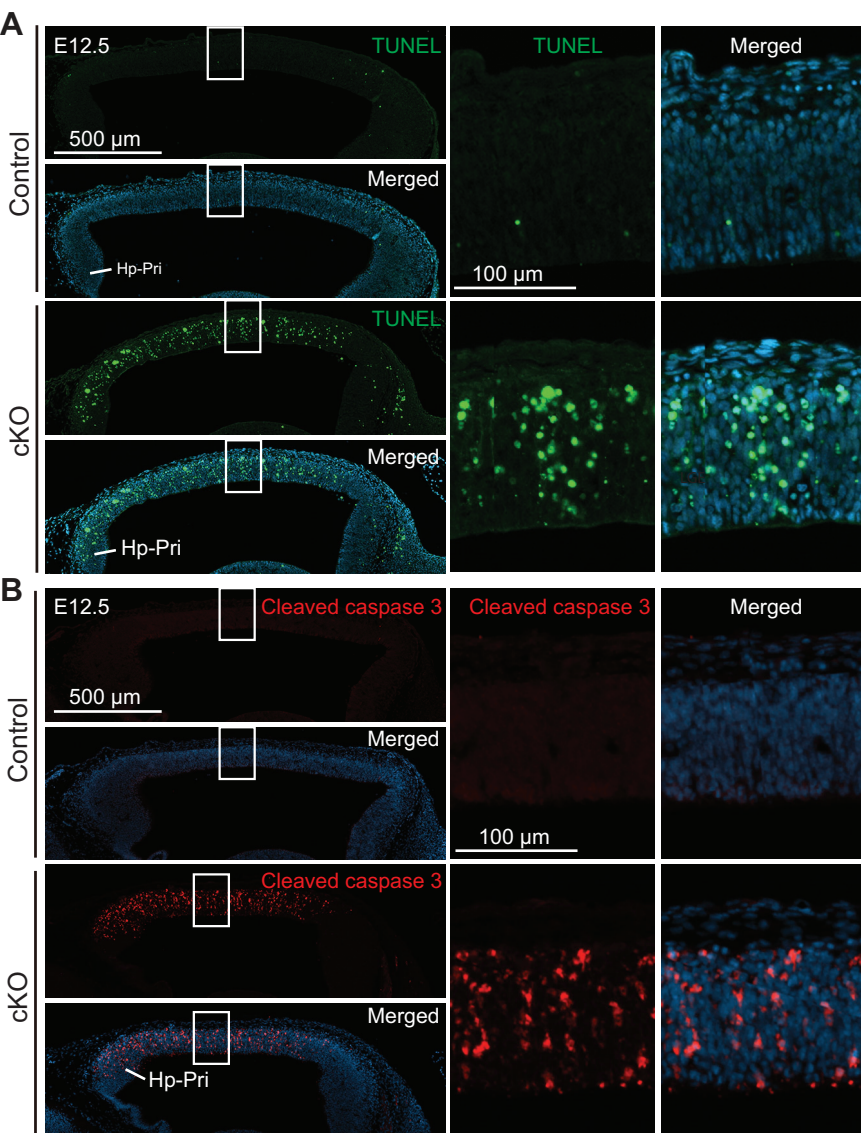

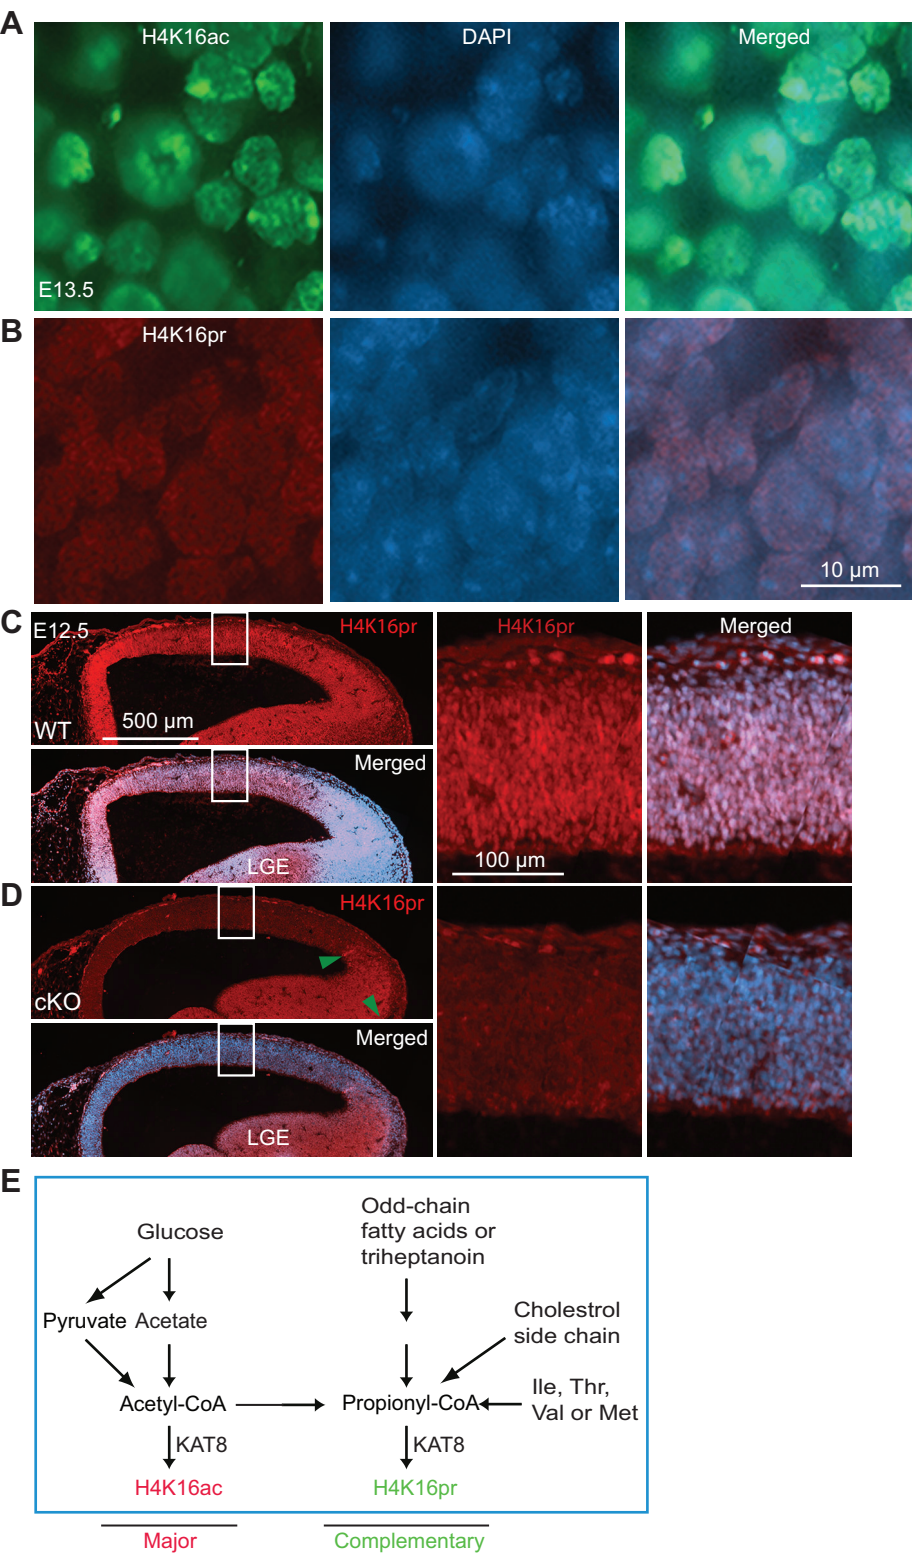

**A** Subject T3 (p.Tyr90Cys)

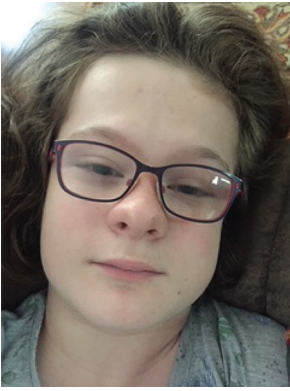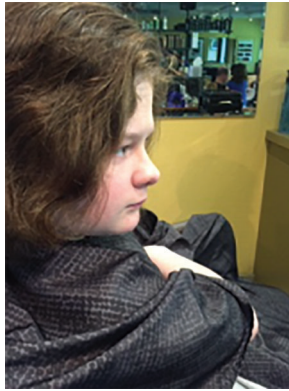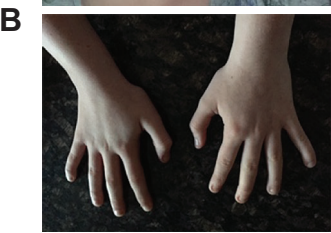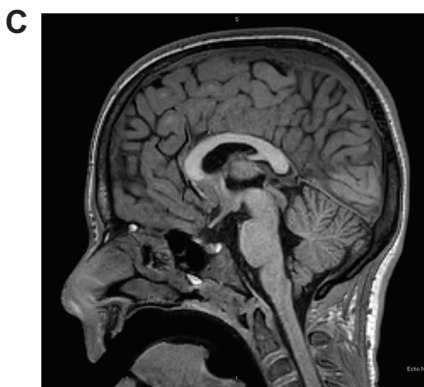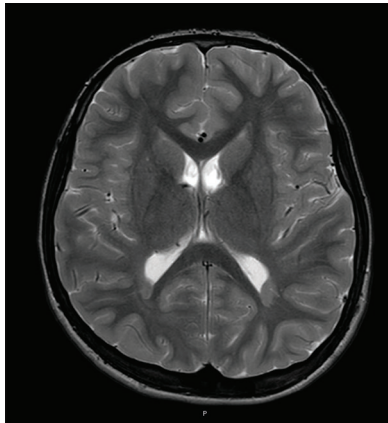

A

T6 (p.Ala165Val)

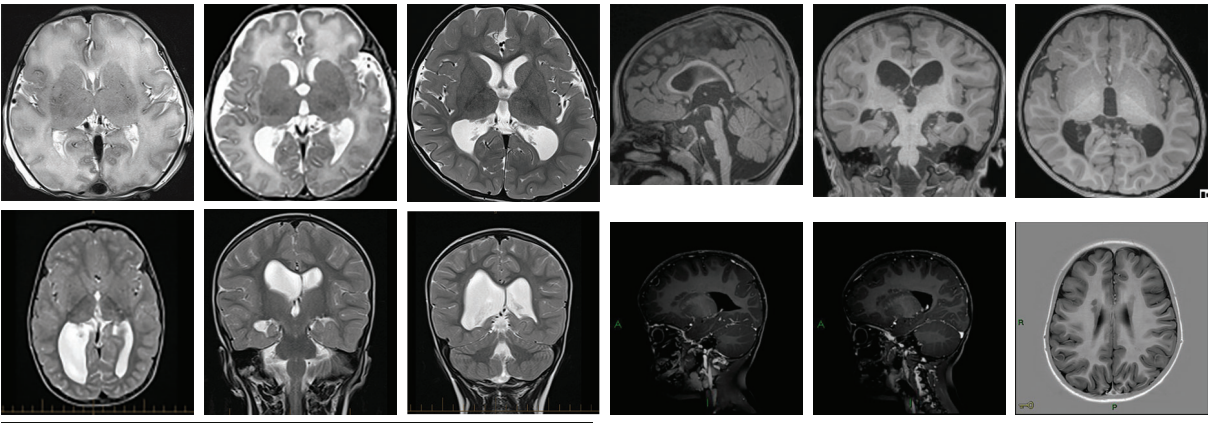

T7 (p.Lys175Glu)

T9 (p.Lys175\*/p.Arg325Cys)

B

T7 (p.Lys175Glu)

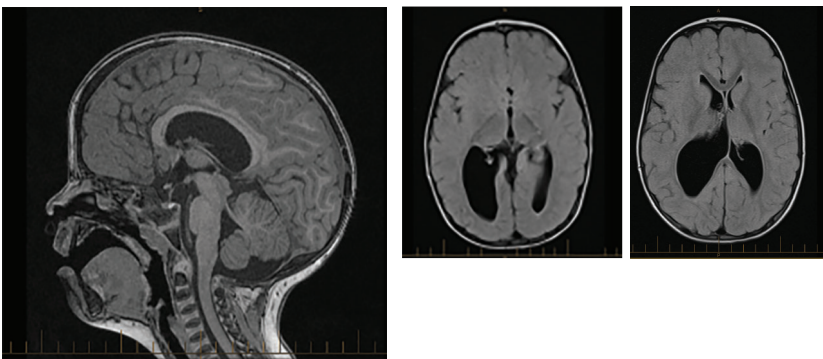

C

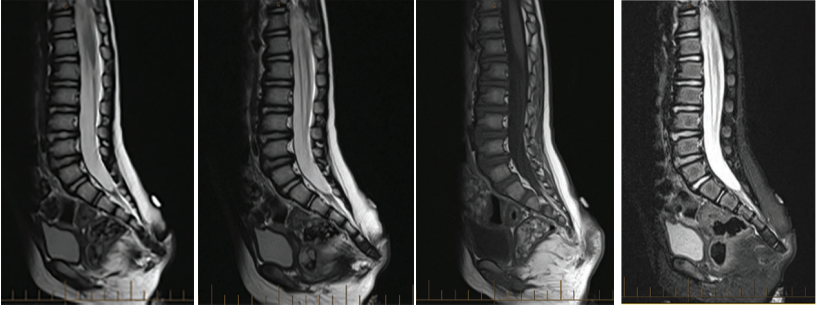

**A**

|       |     |                                                                |     |
|-------|-----|----------------------------------------------------------------|-----|
| Human | 61  | YLCRRPDSTWHSAEVIQSRVNDQEGR-EEFYVHYVGFNRRLDEWVDKNRLA-----       | 110 |
|       |     | Y RR D T H +V+QSR + +E+YVHYVG NRRLD WV ++R++                   |     |
| Fly   | 383 | YFIRREDGTVHRGQVLQSRRTTENAAAPDEYYVHYVGLNRRLDGVWGRHRISDNADDLGGI  | 442 |
|       |     | Chromobarrel                                                   |     |
| Human | 111 | -----LTKTVKDAVQKNSEK-----YLS----ELAEQPERKI                     | 138 |
|       |     | L + A +SE+ YLS + +RK+                                          |     |
| Fly   | 443 | TVLPAPPLAPDQPSTSTREMLAQAAAAAAAAASSERQKRAANKDYLSYCENSRYDYSDRKM  | 502 |
| Human | 139 | TRNQKRKHDEINHVQKTYAEMDPTTAAALEKEHEAITKVKYVDKIHIGNYEIDAWYFSPFP  | 198 |
|       |     | TR QKR++DEINHVQK++AE+ T AALEKEHE+ITK+KY+DK+ GNYEID WYFSPFP     |     |
| Fly   | 503 | TRYQKRRYDEINHVQKSHAELTATQAALKEKESITKIKYIDKLQFGNYEIDTWYFSPFP    | 562 |
|       |     | KAT8/Mof-specific                                              |     |
| Human | 199 | EDYGKQPKLWLCEYCLKYMKYEKSYRFHLGQCQWRPPGKEIYRKSNISVYEVGDKDHI     | 258 |
|       |     | E+YGK L++CEYCLKYM++ SY +HL +C R+PPG+EIYRK NIS+YEV+GK+ +        |     |
| Fly   | 563 | EEYGKARTLYVCEYCLKYMFRSSYAYHLHECDRRRPPGREIYRKGNISIYEVNGKEESL    | 622 |
|       |     | Autoacetylation                                                |     |
| Human | 259 | YCQNLCLLAKLFLDHKITLYFDVEPFVYILTEVDRQGAHIVGYFSKEKESPDGNNVACIL   | 318 |
|       |     | YCQ LCL+AKLFLDHK LYFD++PF+FYIL E D++G+HIVGYFSKEK+S + NVACIL    |     |
| Fly   | 623 | YCQLLCLMAKLFLDHKVLYFDMDPFLFYILCETDKEGSHIVGYFSKEKKSLENYNVACIL   | 682 |
| Human | 319 | TLPPYQRRGYGKFLIAFSYELSKLESTVGSPEKPLSDLGKLSYRSYWSWVLEIL--RDF    | 376 |
|       |     | LPP+QR+G+GK LIAFSYELS+ E +GSPEKPLSDLG+LSYRSYW++ LLE++ R        |     |
| Fly   | 683 | VLPPHORRKGFGKLLIAFSYELSRKEGVIGSPEKPLSDLGRLSYRSYWAYTLEELMKTRCA  | 742 |
|       |     | Acetyl-CoA binding                                             |     |
| Human | 377 | RGTLSEIKDLSQMTSITQNDIISTLQSLNMVQYWKQGHVICVTPKLVVEEHLKSAQYKKPPI | 436 |
|       |     | ++IK+LS+M+ IT +DII TLQS+ M+KYWKQ+VICVT K +++HL+ Q+K+P +        |     |
| Fly   | 743 | PEQITIKELSEMSGITHDDIIYTLQSMKMIKYWKQGNVICVTSKTIQDHLQLPQFKQPKL   | 802 |
| Query | 437 | TVDSVCLKWAP 447                                                |     |
|       |     | T+D+ L W+P                                                     |     |
| Fly   | 803 | TIDTDYLVWSP 813                                                |     |

Acetyltransferase

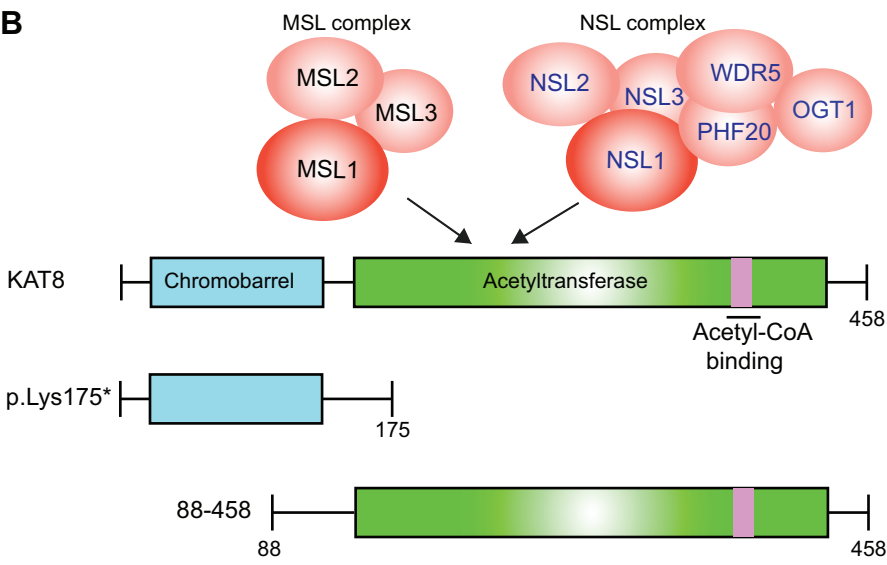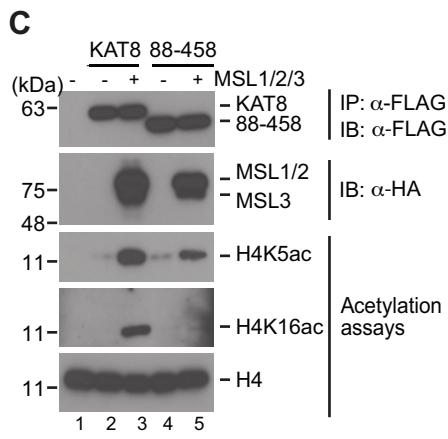

Table S1 Genetic information and clinical features of nine individuals with *KAT8* variants

| Subject ID                                | T1                                                                                                    | T2                                                                                                                                                                                 | T3                                                                          | T4                                                                                                                     | T5                                                                                      | T6                                                                                                                                                                                                    | T7                                                                                              | T8                                                                                                                                                            | T9                                                                                                                                                                                                                |
|-------------------------------------------|-------------------------------------------------------------------------------------------------------|------------------------------------------------------------------------------------------------------------------------------------------------------------------------------------|-----------------------------------------------------------------------------|------------------------------------------------------------------------------------------------------------------------|-----------------------------------------------------------------------------------------|-------------------------------------------------------------------------------------------------------------------------------------------------------------------------------------------------------|-------------------------------------------------------------------------------------------------|---------------------------------------------------------------------------------------------------------------------------------------------------------------|-------------------------------------------------------------------------------------------------------------------------------------------------------------------------------------------------------------------|
| Mutation on NM_032188.2                   | c.269A>G                                                                                              | c.269A>G                                                                                                                                                                           | c.269A>G                                                                    | c.293G>A                                                                                                               | c.296G>A                                                                                | c.494C>T                                                                                                                                                                                              | c.523A>G                                                                                        | c.543G>C                                                                                                                                                      | c.523A>T & c.973C>T                                                                                                                                                                                               |
| Protein alteration                        | p.Tyr90Cys                                                                                            | p.Tyr90Cys                                                                                                                                                                         | p.Tyr90Cys                                                                  | p.Arg98Gln                                                                                                             | p.Arg99Gln                                                                              | p.Ala165Val                                                                                                                                                                                           | p.Lys175Glu                                                                                     | p.Lys181Asn                                                                                                                                                   | p.Lys175* & p.Arg325Cys                                                                                                                                                                                           |
| Transmission                              | <i>De novo</i>                                                                                        | <i>De novo</i>                                                                                                                                                                     | <i>De novo</i>                                                              | <i>De novo</i>                                                                                                         | <i>De novo</i>                                                                          | <i>De novo</i>                                                                                                                                                                                        | <i>De novo</i>                                                                                  | <i>De novo</i>                                                                                                                                                | Inherited                                                                                                                                                                                                         |
| Family history                            | Non-contributory, but patient has multiple regions of homozygosity detected by chromosome microarray. | One brother: autism, ODD and ADHD; another with autism and ADHD. A sister: ADD and seizures. Father: dyslexia but no intellectual disability. Mother may have learning disability. | Non-contributory.                                                           | Negative for developmental delay or seizures. Mother's orbital frontal cortex + 3 SD. Parents are of Moroccan descent. | First child of nonconsanguineous parents.                                               | Mother's sibling with fragile X syndrome, for which the mother is the carrier.                                                                                                                        | At birth of this subject, both parents were 35 years old, with no known exposure to teratogens. | Non-consanguineous. Parents have mild learning difficulties and 2 children, w/ the proband as the 2nd. Brother has mild learning and behavioral difficulties. | Parents, asymptomatic monoallelic carriers of the mutations. A sister has the c.973C>T mutation and is asymptomatic. One missed abortion at 9 weeks of gestation, with no material available for genetic testing. |
| Pregnancy issues                          | Maternal stress, poor nutrition.                                                                      | None                                                                                                                                                                               | 31-year old mother with subchorionic hemorrhage during the first trimester. | None                                                                                                                   | History of rheumatic disease in the mother.                                             | IUGR, reduced fetal movements prior to delivery.                                                                                                                                                      | Normal vaginal delivery, full-term. Prenatal ultrasound examination normal.                     | Reduced fetal movements. Poor prenatal growth.                                                                                                                | None                                                                                                                                                                                                              |
| Delivery issues (specify gestational age) | 40-week gestation.                                                                                    | None, full term.                                                                                                                                                                   | Induced vaginal delivery, due to fluid leakage at 38-week gestation.        | Born at term.                                                                                                          | 42 weeks, delivery with a vacuum extractor. APGAR scores 9 and 9 after 1 and 5 minutes. | 37 weeks 4 days, poor biophysical profile, C-section. Mother: perinatal depression, concern for prenatal etiology e.g. metabolic and infectious cause. Hydropic at birth: ascites, pleural effusions. | None. Delivered at 40 weeks and 5 days.                                                         | None recorded. At term, via normal vaginal delivery.                                                                                                          | None. Delivered at 40 weeks.                                                                                                                                                                                      |
| Birth Weight                              | 2.86 kg                                                                                               | 3.26 kg                                                                                                                                                                            | 2.84 kg                                                                     | N/A                                                                                                                    | 3.1 kg                                                                                  | 2.22 kg (<3rd centile)                                                                                                                                                                                | 2.89 kg                                                                                         | 2.8 kg                                                                                                                                                        | 2.59 kg                                                                                                                                                                                                           |
| Birth Length                              | Unknown                                                                                               | 50.8 cm                                                                                                                                                                            | 45.7 cm                                                                     | N/A                                                                                                                    | Unknown                                                                                 | 47 cm (6th centile)                                                                                                                                                                                   | 50.8 cm                                                                                         | Not recorded                                                                                                                                                  | 48 cm                                                                                                                                                                                                             |
| Birth Head circumference                  | Unknown                                                                                               | 45.5 cm at 9.5 months (75 <sup>th</sup> centile)                                                                                                                                   | Unknown                                                                     | N/A                                                                                                                    | Unknown                                                                                 | 32 cm (3rd centile)                                                                                                                                                                                   | Unknown                                                                                         | In 1 <sup>st</sup> 12 months, increased from                                                                                                                  | 35 cm                                                                                                                                                                                                             |



|                   |                                                                                                          |                                        |                                                                                                                                                                                                        |           |                              |                                                                                                                                                                                                                                                                                                                                                                                                                                                                       |                                                                                                                                                                                                                                                     |                                                                                          |     |
|-------------------|----------------------------------------------------------------------------------------------------------|----------------------------------------|--------------------------------------------------------------------------------------------------------------------------------------------------------------------------------------------------------|-----------|------------------------------|-----------------------------------------------------------------------------------------------------------------------------------------------------------------------------------------------------------------------------------------------------------------------------------------------------------------------------------------------------------------------------------------------------------------------------------------------------------------------|-----------------------------------------------------------------------------------------------------------------------------------------------------------------------------------------------------------------------------------------------------|------------------------------------------------------------------------------------------|-----|
|                   |                                                                                                          |                                        |                                                                                                                                                                                                        |           |                              |                                                                                                                                                                                                                                                                                                                                                                                                                                                                       |                                                                                                                                                                                                                                                     | 50 <sup>th</sup> to 98 <sup>th</sup> centile.                                            |     |
| Neonatal issues   | Weak, poor feeding, poor weight gain, jaundice, in NICU (newborn intensive care unit) at 2 weeks of age. | Atrial and ventricular septal defects. | Congenital unilateral hip dysplasia<br>Jaundice.                                                                                                                                                       | None      | None                         | Very sick for several months, hydrops, transient hepatosplenomegaly, hypoglycemia, transaminitis, coagulation defects, congenital vascular anomalies, differential diagnosis included lysosomal storage disorder, mitochondrial disorder, congenital disorders of glycosylation, sulfite oxidase/molybdenum cofactor deficiency, Niemann-Pick and other metabolic disorders, connective tissue disorders, channelopathy, nitric oxide defect or congenital infection. | None                                                                                                                                                                                                                                                | Poor weight gain, needed high calorie milk.                                              | N/A |
| Gross motor delay | Yes                                                                                                      | Yes<br>First walked after 2 years.     | Yes, sat independently at 14 months, crawled at 15 months, and walked independently at 20 months<br>Was in Spica cast from 7-9 months and Rhino brace until 12 months due to congenital hip dysplasia. | Yes, mild | Walking at 18 months of age. | Yes                                                                                                                                                                                                                                                                                                                                                                                                                                                                   | Yes, did not roll until 5-6 months of age. Sitting unassisted and pulling to stand at 9 months. Walked at 15 months but required AFOs due to pronation. At age 3, ran with awkward gait, but was very clumsy, w/ both feet not off the floor at the | Yes, hypotonia. Tired easily and required wheelchair for longer journeys. Unsteady gait. | Yes |

|                                                                                  |                                                                                                                                                                                                                                                                                                           |                      |                                                                                                                                                |       |                                                                                                                                                                                                                                                        |                                                         |                                                                                                                                                                                                                                                                                                                                                                                          |                                                                                 |                                                                                                                                |
|----------------------------------------------------------------------------------|-----------------------------------------------------------------------------------------------------------------------------------------------------------------------------------------------------------------------------------------------------------------------------------------------------------|----------------------|------------------------------------------------------------------------------------------------------------------------------------------------|-------|--------------------------------------------------------------------------------------------------------------------------------------------------------------------------------------------------------------------------------------------------------|---------------------------------------------------------|------------------------------------------------------------------------------------------------------------------------------------------------------------------------------------------------------------------------------------------------------------------------------------------------------------------------------------------------------------------------------------------|---------------------------------------------------------------------------------|--------------------------------------------------------------------------------------------------------------------------------|
|                                                                                  |                                                                                                                                                                                                                                                                                                           |                      |                                                                                                                                                |       |                                                                                                                                                                                                                                                        |                                                         | same time. Can now go up and down stairs using a railing but cannot jump.                                                                                                                                                                                                                                                                                                                |                                                                                 |                                                                                                                                |
| Fine motor delay                                                                 | Yes                                                                                                                                                                                                                                                                                                       | Yes                  | Yes                                                                                                                                            | Yes   | Unknown                                                                                                                                                                                                                                                | Yes                                                     | Yes                                                                                                                                                                                                                                                                                                                                                                                      | Yes                                                                             | Yes                                                                                                                            |
| Language delay                                                                   | Yes                                                                                                                                                                                                                                                                                                       | Yes                  | Yes- had a few words at 20 months, with receptive and expressive language moderately delayed, as well as mild articulation problems.           | Yes   | Time of first words: 18 months. Difficulty with pronunciation, Ability to form sentences: 4 years.                                                                                                                                                     | Yes<br>Does not speak & can follow few simple commands, | Yes, 1th word ("dada") at 12-13 months. At age 2, did some sign language but still had the single word "dada." Very good receptive language skills but had difficulty with expressive language.                                                                                                                                                                                          | Yes<br>First word at 4; Short, simple sentences at 5.                           | Yes<br>At 2, had no words or syllables but understood simple instructions. At 4, still spoke no words, with autistic features. |
| Developmental delay or intellectual disability (see below for additional issues) | GDD and moderate intellectual disability (estimated).<br><br>Speaks in short phrases, simple directions. Writes first but not last name. Does not know phone #, but knows address, state, country. Does not understand money.<br><br>Cannot count to 100. Parents are requesting legal power of attorney. | Yes – GDD & ADHD     | GDD and mild intellectual disability. Full scale IQ using the Wechsler Intelligence Scale (WISC-V) at the age of 11 years and 7 months was 55. | IQ 50 | Yes, no formal IQ-test available.<br><br>Memory: very good ("perfect").<br>Interests: music, cars, trains, planes<br>Knows numbers and can count;<br>Problems with arithmetic<br>Behavior: social, kind, shy.<br><br>Does not know the value of money. | Receiving speech therapy, PT, OT every week.            | Yes, diagnosed with autism spectrum disorder at the age of 2 years and 3 months. At 6 months, not responding to her name. At 12 months, not clapping, waving, or following objects, and only interested in reading. At 18 months, still not pointing, clapping, or waving; still only interested in books and not playing with other toys. At 2, now clapping and occasionally pointing. | Intellectual disability – moderate. Struggle a lot with numbers and with money. | Severe and autism                                                                                                              |
| Seizures                                                                         | No                                                                                                                                                                                                                                                                                                        | One febrile seizure. | Yes- mixed, first grand mal seizure requiring                                                                                                  | Yes   | No                                                                                                                                                                                                                                                     | Yes, absence and clonic. Treated with levetiracetam,    | Yes<br>Seizures EEG reports:                                                                                                                                                                                                                                                                                                                                                             | Yes<br>Treated with sodium                                                      | Yes<br>Due to recurrent                                                                                                        |

|  |  |  |                                                                                                                                                                                                                                                                                                                                                                                                                                                                                                                                                                                                  |  |  |                                                                                                                            |                                                                                                                                                                                                                                                                                                                                                                                                                                                                                          |                                                                                                                                                  |                                                                                                                                                                                                                                                                                                                                                                                                                                                                                                                                                                                                                        |
|--|--|--|--------------------------------------------------------------------------------------------------------------------------------------------------------------------------------------------------------------------------------------------------------------------------------------------------------------------------------------------------------------------------------------------------------------------------------------------------------------------------------------------------------------------------------------------------------------------------------------------------|--|--|----------------------------------------------------------------------------------------------------------------------------|------------------------------------------------------------------------------------------------------------------------------------------------------------------------------------------------------------------------------------------------------------------------------------------------------------------------------------------------------------------------------------------------------------------------------------------------------------------------------------------|--------------------------------------------------------------------------------------------------------------------------------------------------|------------------------------------------------------------------------------------------------------------------------------------------------------------------------------------------------------------------------------------------------------------------------------------------------------------------------------------------------------------------------------------------------------------------------------------------------------------------------------------------------------------------------------------------------------------------------------------------------------------------------|
|  |  |  | <p>hospitalization at the age of 8 years and 5 months, currently taking keppra with clonazepam as rescue medication.</p> <p>At the age of 8 years and 11 months: EEG normal during the awake and sleep state</p> <p>At the age of 6 years and 11 months: EEG abnormal, because of the bursts of delta activity, right greater than left, and greater activity on the right side independently. Suggestive of focal to diffuse cerebral irritation. This may be seen in any toxic, metabolic, or diffuse structural lesion. Because of the focality seen, a focal lesion should be ruled out.</p> |  |  | <p>Oxycarbazine. H/o status epilepticus with breakthrough seizures needing diastat and ativan and sometimes admission.</p> | <p>abnormal, it reveals relatively slower occipital dominant rhythm for age, finding suggesting the presence of mild diffuse disturbance in cerebral function. Intermittent superimposed left temporal, and less frequently left occipital spike, sharp and slow wave discharges were seen, finding suggesting the presence of epileptiform activity in these regions. The increased fast (beta) activity is a finding that could be related to medication the patient has received.</p> | <p>valproate. Presented with nocturnal generalized seizures around 3. No generalized seizures for some years, but still has absence seizures</p> | <p>epileptic seizures hydantoin was first added to topiramate with slow down tapering. At 25 months, Levetiracetam was started with slow increase but frequent absence episodes were reported and she had episodes of status epilepticus.</p> <p>At 4, she was treated with valproic acid (depalept, 38 mg/kg) and Levetiracetam with better seizure control, yet still episodes of brief absence and eye blinking.</p> <p>At 32 months, papilledema was diagnosed during a hospitalization and pseudotumor cerebri diagnosed with increased LP pressure and acetazolamide started. Was treated for ~6 months with</p> |
|--|--|--|--------------------------------------------------------------------------------------------------------------------------------------------------------------------------------------------------------------------------------------------------------------------------------------------------------------------------------------------------------------------------------------------------------------------------------------------------------------------------------------------------------------------------------------------------------------------------------------------------|--|--|----------------------------------------------------------------------------------------------------------------------------|------------------------------------------------------------------------------------------------------------------------------------------------------------------------------------------------------------------------------------------------------------------------------------------------------------------------------------------------------------------------------------------------------------------------------------------------------------------------------------------|--------------------------------------------------------------------------------------------------------------------------------------------------|------------------------------------------------------------------------------------------------------------------------------------------------------------------------------------------------------------------------------------------------------------------------------------------------------------------------------------------------------------------------------------------------------------------------------------------------------------------------------------------------------------------------------------------------------------------------------------------------------------------------|

|                                  |                                                                                                                      |                                                                                                                                                                                                                                                    |                                                                                                                                                                                                                                                                                                                                                                                                                                                          |              |     |                                                                                                                                                                                        |                                                                                                                                                                                                                                                                                                                                                                                                                                                                                          |                                                                                                                                                                                                                                                            |                                                          |
|----------------------------------|----------------------------------------------------------------------------------------------------------------------|----------------------------------------------------------------------------------------------------------------------------------------------------------------------------------------------------------------------------------------------------|----------------------------------------------------------------------------------------------------------------------------------------------------------------------------------------------------------------------------------------------------------------------------------------------------------------------------------------------------------------------------------------------------------------------------------------------------------|--------------|-----|----------------------------------------------------------------------------------------------------------------------------------------------------------------------------------------|------------------------------------------------------------------------------------------------------------------------------------------------------------------------------------------------------------------------------------------------------------------------------------------------------------------------------------------------------------------------------------------------------------------------------------------------------------------------------------------|------------------------------------------------------------------------------------------------------------------------------------------------------------------------------------------------------------------------------------------------------------|----------------------------------------------------------|
|                                  |                                                                                                                      |                                                                                                                                                                                                                                                    |                                                                                                                                                                                                                                                                                                                                                                                                                                                          |              |     |                                                                                                                                                                                        |                                                                                                                                                                                                                                                                                                                                                                                                                                                                                          |                                                                                                                                                                                                                                                            | acetazolamide but stopped due to adverse effect.         |
| Other neurological abnormalities | No ataxia, but it's hard for her to balance. Cannot run. All responses/movements are slow. Otherwise non-focal exam. | Some aggressive behaviors, temper tantrums, rocking, self-stimulation. Significant head injury secondary to a fall; no imaging done.                                                                                                               | Neuronal migration disorder<br>Generalized hypotonia.                                                                                                                                                                                                                                                                                                                                                                                                    | Nasal speech | No  | Low appendicular tone with increased passive range of motion, deep tendon reflexes present 2+, wide based gait                                                                         | Barely able to draw lines due to difficulty in pencil grip. Unable to jump with two feet, but able to run or climb stairs. Motor imitation is very impaired and cannot imitate others' actions.                                                                                                                                                                                                                                                                                          | Autistic features<br>Delayed visual maturation.                                                                                                                                                                                                            | N/A                                                      |
| Brain MRI                        | Unremarkable brain MRI.                                                                                              | Focal subcortical white matter lesion in right posterior frontal lobe. Most recent MRI indicated mild enlargement of the sella – suggested in her age group likely secondary to incompetent diaphragmatic sella; gland was otherwise unremarkable. | At the age of 11 years and 7 months:<br>1) There is a new area of high T2 and T2 FLAIR signal within the right mesial temporal lobe. This could be post seizure affect or quite possibly seizure focus amongst multiple abnormal foci of subependymal gray matter heterotopia.<br>2) Otherwise stable multiple subependymal gray matter heterotopias involving bilateral medial temporal lobes/hippocampi, and temporal horns of the lateral ventricles. | Normal       | N/A | At 2: possible polymicrogyria of left inferior frontal lobe, bilateral small hippocampi, moderate ventriculomegaly, diffuse white matter volume loss with periventricular leukomalacia | At the age of 2 years and 2 months:<br>1) Multiple foci of subependymal heterotopic gray matter. Seizures are common clinical sequelae of heterotopic gray matter, but do not occur in all patients.<br>2) Ventriculomegaly, right greater than left with associated decreased periventricular white matter volume and thinning of the corpus callosum.<br>3) Dysmorphic shape to coccyx with superficial induration/inflammation of the subcutaneous fat. This could be due to pressure | At 11 months: prominent ventricular system and extra cerebral CSF spaces. Non-specific small foci of high signal intensity in left caudate nucleus, thought to represent enlarged perivascular CSF spaces. Slight underdevelopment of the corpus callosum. | Delayed myelination. A recent MRI suggested heterotopia. |

|  |  |  |                                                                                                                                                                                                                                                                                                                                                                                                                                                                                                                                                                                                                                                       |  |  |  |                                                                                                                                       |  |  |
|--|--|--|-------------------------------------------------------------------------------------------------------------------------------------------------------------------------------------------------------------------------------------------------------------------------------------------------------------------------------------------------------------------------------------------------------------------------------------------------------------------------------------------------------------------------------------------------------------------------------------------------------------------------------------------------------|--|--|--|---------------------------------------------------------------------------------------------------------------------------------------|--|--|
|  |  |  | <p>3) Subtle asymmetry to the right pituitary gland. This is not dedicated pituitary protocol. Dedicated pituitary imaging could be performed if clinical concern exists.</p> <p>At the age of 9 years and 3 months: Multiple posterior subependymal gray matter heterotopias adjacent to the posterior bodies of the lateral ventricles and in the medial temporal lobes. Normal MR venogram. Mild bulging of the optic papilla bilaterally consistent with the given clinical diagnosis of papilledema.</p> <p>At the age of 8 years and 5 months: No acute interval changes. Patient with multiple neuronal migration anomalies in the form of</p> |  |  |  | <p>from the underlying bone versus infected fibers no open sinus tract or presacral meningocele is seen.<br/>4) No tethered cord.</p> |  |  |
|--|--|--|-------------------------------------------------------------------------------------------------------------------------------------------------------------------------------------------------------------------------------------------------------------------------------------------------------------------------------------------------------------------------------------------------------------------------------------------------------------------------------------------------------------------------------------------------------------------------------------------------------------------------------------------------------|--|--|--|---------------------------------------------------------------------------------------------------------------------------------------|--|--|

|                          |                                                                                               |                |                                                                                                                                                                                |                                    |                      |                                            |                                                                      |                                                      |                                                  |
|--------------------------|-----------------------------------------------------------------------------------------------|----------------|--------------------------------------------------------------------------------------------------------------------------------------------------------------------------------|------------------------------------|----------------------|--------------------------------------------|----------------------------------------------------------------------|------------------------------------------------------|--------------------------------------------------|
|                          |                                                                                               |                | subependymal heterotopic gray matter bilaterally along the temporal horns and peritrial region. Multiple foci of gray matter heterotopia are seen along bilateral hippocampus. |                                    |                      |                                            |                                                                      |                                                      |                                                  |
| Age at last follow-up    | 18 years                                                                                      | 13 years       | 11 years 10 months                                                                                                                                                             | 11 years                           | 6 years and 6 months | 2 years                                    | 5 years                                                              | 11 years                                             | 2.6 years                                        |
| Gender                   | Female                                                                                        | Female         | Female                                                                                                                                                                         | F                                  | Male                 | Male                                       | Female                                                               | Male                                                 | Female                                           |
| Weight at last follow-up | 48.7 kg                                                                                       | 47.4kg         | 43.1kg                                                                                                                                                                         | NA                                 | 24.9 kg (+0.47 SD)   | 12.2 kg (24th centile)                     | 14.7 kg (36th centile)                                               | 21 kg at age of 6 years 6 months                     | 9 kg                                             |
| Height at last follow-up | 156.9 cm                                                                                      | 151.2 cm       | 141.1cm                                                                                                                                                                        | 140.2 cm (-1.4 SD)                 | 125 cm (+0.3 SD)     | 87.2 cm (23rd centile)                     | 96.3 cm (37th percentile).                                           | 118 cm at 6 years 6 months                           | 81 cm                                            |
| Head circumference       | 55.5 cm                                                                                       | 57.4cm         |                                                                                                                                                                                | 57.5 cm (+2.5 SD)                  | 55 cm (+1.82SD)      | 46 cm (2.5 centile)                        | 53.5 cm (>97th centile)                                              | 56 cm (at the age of 6 years and 6 months)           | 48.2 cm                                          |
| Cranial shape            | Mild brachycephaly                                                                            | Normal         | Relative macrocephaly                                                                                                                                                          | Normal                             | Normal               | Microcephaly, flat occiput                 | Normal skull shape                                                   | Asymmetric skull shape with wide anterior fontanelle | Occipital flattening                             |
| Forehead                 | Narrow                                                                                        | N/A            | High and broad                                                                                                                                                                 | N/A                                | Normal               | N/A                                        | N/A                                                                  | Broad                                                | Frontal bossing upper part                       |
| Face                     | Asymmetric, decreased facial expression, severe micrognathia                                  | Not dysmorphic | N/A                                                                                                                                                                            | N/A                                | Normal               | Elongated face (coarse during infancy).    | Malar hypoplasia and bitemporal narrowing                            | Mild facial dysmorphism                              | Flat midface                                     |
| Hair                     | Low anterior hairline                                                                         |                | N/A                                                                                                                                                                            | Thick curly hair                   | Normal               | No issues                                  | Thick, wiry, curly hair. Slightly sparse at temples. Sparse eyebrows | Normal                                               | fine                                             |
| Eyes (dysmorphisms)      | Hypotelorism, shallow and asymmetric orbits, endpoint nystagmus, intermittent left esotropia, | WNL            | N/A                                                                                                                                                                            | Short upslanted palpebral fissures | No                   | Inner epicanthal folds, ptosis, cross eyed | Telecanthus. Brown irides.                                           | Bilateral squint                                     | almond shaped upslant eyes with epicanthal folds |

|                     |                                                                                      |                                   |                                                                                            |                                         |        |                                                           |                                                                                                                                                                             |            |                               |
|---------------------|--------------------------------------------------------------------------------------|-----------------------------------|--------------------------------------------------------------------------------------------|-----------------------------------------|--------|-----------------------------------------------------------|-----------------------------------------------------------------------------------------------------------------------------------------------------------------------------|------------|-------------------------------|
|                     | full arched brows.                                                                   |                                   |                                                                                            |                                         |        |                                                           |                                                                                                                                                                             |            |                               |
| Vision              | High hyperopia, left esotropia, glasses for reading only now, vision has improved??? | Partially accommodative esotropia | Glasses for hyperopia<br>Papilledema                                                       | N/A                                     | Normal | Hyperopia                                                 | Deposits of pigment on the retina. Otherwise, normal ocular health.                                                                                                         | Good       | normal                        |
| Ears (dysmorphisms) | Low set, mildly prominent                                                            | WNL                               | N/A                                                                                        | Slightly cupped and posteriorly rotated | No     | Very prominent and large ears (? related to fragile X)    | Thick over folded ear helices. Ears are cupped and low set Left > right. No pits or tags. Ear length: Right: 5.0 cm (25th-50th percentile). Left: 4.5 cm (<3rd percentile). | Normal     | Low set                       |
| Hearing             | No concerns                                                                          | Normal                            | Normal                                                                                     | N/A                                     | Normal | N/A                                                       | Normal                                                                                                                                                                      | Normal     | normal                        |
| Nose                | Prominent, high nasal bridge, long deviated septum                                   |                                   | N/A                                                                                        | Columnella under alae nasi              | Normal | Slightly depressed nasal root and bulbous tip of the nose | Depressed nasal bridge. More prominent bulbous nasal tip. Thick alae and columella. Long deep philtral pillars and groove.                                                  | Small nose | Small, depressed nasal bridge |
| Mouth               | Full lips, poor dental hygiene, carious teeth                                        | Lots of cavities                  | N/A                                                                                        | N/A                                     | Normal | Smooth philtrum, thick lips                               | Slight micrognathia with small mouth. Normal tongue. Thin lips.                                                                                                             | Thin lips  | Thin upper lip                |
| Palate              | high arched palate                                                                   | WNL                               | N/A                                                                                        | N/A                                     | Normal | N/A                                                       | Mildly high palate. Single uvula.                                                                                                                                           | Normal     | Normal                        |
| Hands               | Sloped shoulders, contracted elbows with decreased carrying angle,                   | WNL                               | Bilateral contractures of the 5 <sup>th</sup> digits – surgical release in 5 years of age. | Hockey-stick creases                    | Normal | No concerns                                               | Wrinkling of skin on palms. Fifth finger clinodactyly. Flexible fingers. Total hand                                                                                         | Normal     | Normal                        |

|                                                 |                                                                             |                                                                                                                                           |                                                                                                                           |     |                                         |                                                            |                                                                                                                                                                                                                                                                         |                                     |                                             |
|-------------------------------------------------|-----------------------------------------------------------------------------|-------------------------------------------------------------------------------------------------------------------------------------------|---------------------------------------------------------------------------------------------------------------------------|-----|-----------------------------------------|------------------------------------------------------------|-------------------------------------------------------------------------------------------------------------------------------------------------------------------------------------------------------------------------------------------------------------------------|-------------------------------------|---------------------------------------------|
|                                                 | hyperextended wrists, slim long fingers, 2-3-4 syndactyly (mild, bilateral) |                                                                                                                                           |                                                                                                                           |     |                                         |                                                            | length: 10.0 cm (<3rd percentile); Middle finger length: 4.5 cm (3rd-25th percentile).                                                                                                                                                                                  |                                     |                                             |
| Feet                                            | Long, slender legs, long toes                                               | WNL                                                                                                                                       | Overlapping 2 <sup>nd</sup> , 3 <sup>rd</sup> and 4 <sup>th</sup> toes bilaterally                                        | N/A | Some spatulate toes (broad rounded end) | No concerns                                                | Normal appearance of feet and toes. Mildly overlapping toes.                                                                                                                                                                                                            | Normal                              | Normal                                      |
| Heart                                           | At one point had dilated aortic root, more recently echo was normal (2016). | ASD and VSDs; all closed spontaneously except one very small mid to low muscular VSD present in 2016 and is hemodynamically insignificant | At 11 years 4 months of age: Normal sinus rhythm. Borderline prolonged QT. No previous ECGs available. No echocardiogram. | N/A | No heart murmur                         | Needed PDA ligation, pulmonary hypertension during infancy | Normal echocardiogram                                                                                                                                                                                                                                                   | Cardiac examination normal, no echo | Normal                                      |
| Kidneys                                         | N/A                                                                         | N/A                                                                                                                                       | N/A                                                                                                                       | N/A | Unknown                                 | Normal                                                     | Normal renal ultrasound.                                                                                                                                                                                                                                                | No concerns, no scans               | Mild dilatation of left renal pelvis        |
| Feeding difficulties                            | Only as infant                                                              | No                                                                                                                                        | None                                                                                                                      | No  | No                                      | None                                                       | None                                                                                                                                                                                                                                                                    | Yes –poor weight gain in infancy,   | Failure to thrive feeding diff. after birth |
| Additional issues with intellectual development | N/A                                                                         | N/A                                                                                                                                       | N/A                                                                                                                       | N/A | N/A                                     | N/A                                                        | At 7, can speak, but articulation is poor. Scored at 60% intelligible to unfamiliar listener. Speaking in full sentences, but mostly simple statements and questions. Repeats many phrases. Started talking in single words at 3 and putting two phrases together at 4. | N/A                                 | N/A                                         |



|                         |                                                                                                                                                                |                                                                                |                                                                                                                                                                                                                                                                                                                                                                                                                                                                                                |     |     |                                                                                                                                                                                                    |                                                                                                                                                                                                                                                                                                                                                                                                                                                                                           |                                                                               |     |
|-------------------------|----------------------------------------------------------------------------------------------------------------------------------------------------------------|--------------------------------------------------------------------------------|------------------------------------------------------------------------------------------------------------------------------------------------------------------------------------------------------------------------------------------------------------------------------------------------------------------------------------------------------------------------------------------------------------------------------------------------------------------------------------------------|-----|-----|----------------------------------------------------------------------------------------------------------------------------------------------------------------------------------------------------|-------------------------------------------------------------------------------------------------------------------------------------------------------------------------------------------------------------------------------------------------------------------------------------------------------------------------------------------------------------------------------------------------------------------------------------------------------------------------------------------|-------------------------------------------------------------------------------|-----|
|                         |                                                                                                                                                                |                                                                                |                                                                                                                                                                                                                                                                                                                                                                                                                                                                                                |     |     |                                                                                                                                                                                                    | Excellent, unusually good memory for quotes, books, movies and storytelling. Very interested in music. Can complete 60-piece jigsaw puzzle without help. Her number sense is very severely impaired. Cannot count to three.                                                                                                                                                                                                                                                               |                                                                               |     |
| Other clinical features | Long, lean body build with central weight distribution. Narrow thorax. Pectus excavatum. Scoliosis (triphasic) documented in 2011. Connective tissue "flavor". | Intact hypothalamic pituitary axis<br>Skin picking<br>Trichotillomania<br>PICA | Congenital unilateral hip dysplasia (Spica cast from 7-9 months and Rhino brace until 12 months)<br>Constipation<br>Poor sleep-difficulty initiating and maintaining, takes trazodone at night.<br>Anxiety disorder<br>Attention deficit hyperactivity disorder, combined type, mild growth hormone deficiency (on GHT since the age of 8 years and 10 months), short stature and delayed bone age. Skeletal surveys below:<br><br>At the age of 11 years and 5 months: The patient's skeletal | N/A | N/A | Chest, abnormal protuberance of the right thoracic wall and widely spaced nipples. Several services feel that while he has fragile X, he has several other features not consistent with fragile X. | Localized superficial hemangioma of right upper back - involuting.<br>Sacral dimple.<br><br>The technical quality of the awake portion of the EEG is limited due to the presence of excessive movement, and myogenic artifacts caused by the patient's irritability. There is an occipital dominant rhythm of 7.5-8 Hz. Moderate voltage 18-22 Hz activity is seen in all head regions. Intermittent superimposed moderate voltage 4-6 Hz activity seen in the central regions. Recurrent | Eczema<br>Bilateral pes planus<br>Poor sleep (melatonin)<br>Autistic features | N/A |

|  |  |  |                                                                                                                                                                                                                                                                                                                                                                                                                                                                                                                                                                                                                                                                               |  |  |  |                                                                                                                                                                                                                                                                                                                                                                                                                                                                                                                                                                                                                                                                                                |  |  |
|--|--|--|-------------------------------------------------------------------------------------------------------------------------------------------------------------------------------------------------------------------------------------------------------------------------------------------------------------------------------------------------------------------------------------------------------------------------------------------------------------------------------------------------------------------------------------------------------------------------------------------------------------------------------------------------------------------------------|--|--|--|------------------------------------------------------------------------------------------------------------------------------------------------------------------------------------------------------------------------------------------------------------------------------------------------------------------------------------------------------------------------------------------------------------------------------------------------------------------------------------------------------------------------------------------------------------------------------------------------------------------------------------------------------------------------------------------------|--|--|
|  |  |  | <p>maturation is now normal.</p> <p>At the age of 8 years and 5 months: An AP radiograph of the left hand and wrist was performed and bone age was calculated using the Greulich and Pyle standard. Radiograph is normal. Chronologic age: 9 years and 5 months. Calculated bone age: 6 years and 10 months , with standard deviation of 10.7 months. Gender: Female Conclusion: Delayed bone age.</p> <p>At the age 7 years and 10 months: The patient's chronological age is 7 years and 11 months. The patient's approximate radiologic bone age utilizing the Brush table is 5 years and 9 months. This is slightly over the two standard deviations, consistent with</p> |  |  |  | <p>superimposed left temporal spike, sharp and slow wave discharges were seen.</p> <p>During sleep, the generalized moderate voltage 18-22 Hz (beta) activity were seen in addition to the intermittent superimposed left temporal spike, sharp and slow wave discharges. Also rare left occipital spike, sharp and slow wave discharges were seen during sleep.</p> <p>EKG abnormal, revealing relatively slower occipital dominant rhythm for age, finding suggesting the presence of mild diffuse disturbance in cerebral function. Intermittent superimposed left temporal, and less frequently left occipital spike, sharp and slow wave discharges were seen, finding suggesting the</p> |  |  |
|--|--|--|-------------------------------------------------------------------------------------------------------------------------------------------------------------------------------------------------------------------------------------------------------------------------------------------------------------------------------------------------------------------------------------------------------------------------------------------------------------------------------------------------------------------------------------------------------------------------------------------------------------------------------------------------------------------------------|--|--|--|------------------------------------------------------------------------------------------------------------------------------------------------------------------------------------------------------------------------------------------------------------------------------------------------------------------------------------------------------------------------------------------------------------------------------------------------------------------------------------------------------------------------------------------------------------------------------------------------------------------------------------------------------------------------------------------------|--|--|

|                        |                                                                                                                                                                              |                                                                                       |                                                                                                                                                                                                                                                                                                          |     |                                                                                                                                                                                                                                            |                                                                                                                                                                                                                                                                                                                                    |                                                                                                                                                                                                                                                                 |                                                                                                                                               |     |
|------------------------|------------------------------------------------------------------------------------------------------------------------------------------------------------------------------|---------------------------------------------------------------------------------------|----------------------------------------------------------------------------------------------------------------------------------------------------------------------------------------------------------------------------------------------------------------------------------------------------------|-----|--------------------------------------------------------------------------------------------------------------------------------------------------------------------------------------------------------------------------------------------|------------------------------------------------------------------------------------------------------------------------------------------------------------------------------------------------------------------------------------------------------------------------------------------------------------------------------------|-----------------------------------------------------------------------------------------------------------------------------------------------------------------------------------------------------------------------------------------------------------------|-----------------------------------------------------------------------------------------------------------------------------------------------|-----|
|                        |                                                                                                                                                                              |                                                                                       | delayed bone age.                                                                                                                                                                                                                                                                                        |     |                                                                                                                                                                                                                                            |                                                                                                                                                                                                                                                                                                                                    | presence of epileptiform activity in these regions. The increased fast (beta) activity is a finding that could be related to medication the patient has received.                                                                                               |                                                                                                                                               |     |
| Other genetic findings | Multiple regions of homozygosity (76.4 Mb total), no dosage changes negative studies: fragile X, metabolic screening, homocysteine, FBN1, GFFBR1, TGFB2, myotonic dystrophy. | <i>KMT2C</i> , variant of uncertain significance; <i>MYBPC3</i> , pathogenic variant. | Variants of uncertain significance: <i>WNK1</i> (NM_213655.4) c.2362C>T, p. Arg788Cys (from mother); <i>KIF7</i> (NM_198525.2) c.3944C>T, p. Pro1315Leu (from mother); <i>MYO5A</i> (NM_000259.3) c.52C>T, p.Pro18Ser ( <i>de novo</i> ); <i>PLG</i> (NM_000301.3) c.1259G>A, p.Gly420Asp (from mother). | N/A | SNP array: deletion of 70,5 kb in 2p16.3 and deletion of 7,4 kb in 15q13.3: both deletions were also found in DNA of mother<br>No fragile X syndrome<br>No mutation<br>SLC6A8 gene<br>Metabolic investigations in blood and urine: normal. | <i>FMRI</i> mutation-c-129CGG[>200]; Vascular tortuosity gene panel, Nieman-Pick gene sequencing, CDG transferrin and N-glycan analysis, urine sialic acid, sulfatides gene panel for lysosomal disorders. Wolman's disease enzyme assay, urine succinyl acetone, MPS screen, and serum VLCFA, 7-dehydrocholesterol: all negative. | Microarray analysis: Variant of Unknown Clinical Significance, likely benign, paternally inherited. 15q25.3(83,999,296-84,854,797)x3: 856-kb duplication on 15q25.3. Diagnostic testing via chorionic villus sampling was performed showing normal chromosomes. | 46,XY.arr2p21p16.3 (46,523,660-47,974,691)x3 mat. Chromosome 2p21 duplication of uncertain significance found in proband, mother and brother. | N/A |

Abbreviation: N/A, not available; IUGR, intrauterine growth restriction; GDD, general developmental delay; ADHD, attention deficit hyperactivity disorder; ADD, attention deficit disorder; ODD, oppositional defiant disorder; WNL, within normal limits; SD, standard deviation.
